# Supplementary material for: Ketonization of the remarkably strongly acidic elongated enol generated by flash photolytic decarboxylation of p-benzoylphenylacetic acid in aqueous solution
Source: Royal Society of Chemistry journal article supplement (doi:10.1039/b506706e), 2005-01-01
Supplement: b506706e.pdf [file b506706e.pdf]

# Supplementary Material (ESI) for Chemical Communications  
# This journal is © The Royal Society of Chemistry 2005

**Supplementary Information for:**

**Ketonization of the remarkably strongly acidic elongated enol generated by flash  
photolytic decarboxylation of *p*-benzoylphenylacetic acid in aqueous solution**

Yvonne Chiang,<sup>a</sup> A. Jerry Kresge,<sup>\*a</sup> Ikenna Onyido,<sup>a</sup> John P. Richard,<sup>b</sup> and Peter Wan<sup>c</sup>  
and Musheng Xu<sup>c</sup>

<sup>a</sup>Department of Chemistry, University of Toronto, Toronto, Ontario M5S 3H6, Canada.

E-mail: [akresge@chem.utoronto.ca](mailto:akresge@chem.utoronto.ca); Tel and Fax: (416)-978-7259

<sup>b</sup>Department of Chemistry, University at Buffalo, SUNY, Buffalo, New York 14260-3000, U.S.A.

<sup>c</sup>Department of Chemistry, Box 3065, University of Victoria, Victoria, British Columbia, V8W 3V6, Canada

**Table S1.** Rate Data for the Ketonization of 4-Methylbenzophenone Enol in Aqueous (H<sub>2</sub>O & D<sub>2</sub>O) Perchloric Acid Solutions at 25 °C<sup>a</sup>

| [Acid]/10 <sup>-2</sup> M           | <i>k</i> <sub>obs</sub> /10 <sup>1</sup> s <sup>-1</sup> |
|-------------------------------------|----------------------------------------------------------|
| <b>H<sub>2</sub>O:</b>              |                                                          |
| 0.0100                              | 8.34, 8.39, 7.63, 8.55, 8.88                             |
| 0.0500                              | 3.26, 3.60, 3.24, 3.88, 2.72, 3.90                       |
| 0.100                               | 3.05, 3.14, 3.53, 2.83, 3.49, 3.37                       |
| 0.500                               | 7.45, 7.44, 7.58, 6.87, 7.27, 7.58, 7.54                 |
| 1.00                                | 11.9, 12.3, 12.2, 11.7, 11.9, 13.5                       |
| 1.50                                | 49.1, 51.6, 47.9, 53.4, 48.2, 50.9                       |
| 10.0                                | 126, 111, 107, 124, 104, 108                             |
| 20.0                                | 200, 192, 193, 192, 191, 198                             |
| <b>D<sub>2</sub>O:</b> <sup>b</sup> |                                                          |
| 0.100                               | 0.482                                                    |
| 0.200                               | 0.968                                                    |
| 0.400                               | 1.07                                                     |
| 0.600                               | 1.76                                                     |
| 0.800                               | 2.35                                                     |
| 1.00                                | 2.57                                                     |

<sup>a</sup>Ionic strength = 0.10 M (NaClO<sub>4</sub>).

<sup>b</sup>Each rate constant is based on data accumulated from 2-4 replicate flash photolysis shots.

# Supplementary Material (ESI) for Chemical Communications  
# This journal is © The Royal Society of Chemistry 2005

**Table S2.** Rate Data for the Ketonization of 4-Methylbenzophenone Enol in Aqueous Sodium Hydroxide Solutions at 25 °C<sup>a</sup>

| [Sodium hydroxide]/10 <sup>-2</sup> M | <i>k</i> <sub>obs</sub> /10 <sup>4</sup> s <sup>-1</sup> |
|---------------------------------------|----------------------------------------------------------|
| <b>H<sub>2</sub>O:</b>                |                                                          |
| 0.100                                 | 24.1, 25.1, 25.3, 23.1, 22.7, 24.3                       |
| 1.00                                  | 25.2, 24.9, 25.8, 24.0, 24.6, 24.4                       |
| 10.0                                  | 25.7, 28.2, 24.6, 28.4, 27.2, 27.9                       |
| <b>D<sub>2</sub>O:</b> <sup>b</sup>   |                                                          |
| 0.200                                 | 2.91, 2.94, 2.95, 2.91, 2.95                             |
| 0.960                                 | 2.88, 3.09, 3.15, 3.23, 3.18, 3.13                       |
| 10.0                                  | 3.30, 3.15, 3.30, 3.03, 3.21                             |

<sup>a</sup>Ionic strength = 0.10 M (NaClO<sub>4</sub>).

**Table S3.** Rate Data for the Ketonization of 4-Methylbenzophenone Enol in Aqueous Buffer Solutions at 25 °C<sup>a</sup>

| [Buffer]/10 <sup>-3</sup> M                                                                                        | $k_{\text{obs}}/10^1 \text{ s}^{-1}$ |
|--------------------------------------------------------------------------------------------------------------------|--------------------------------------|
| <b>H<sub>2</sub>O:</b>                                                                                             |                                      |
| HA = CH <sub>3</sub> CO <sub>2</sub> H; [HA]/[A <sup>-</sup> ] = 5.00; [H <sup>+</sup> ] = 1.36×10 <sup>-4</sup> M |                                      |
| 4.80                                                                                                               | 8.67, 8.59, 9.29, 8.62               |
| 9.60                                                                                                               | 11.0, 9.81, 9.28, 9.38               |
| 14.4                                                                                                               | 12.7, 13.5, 13.1, 13.0               |
| 19.2                                                                                                               | 15.0, 15.7, 15.9, 16.1               |
| 24.0                                                                                                               | 17.2, 18.2, 17.3, 17.6               |
| $k_{\text{obs}}/\text{s}^{-1} = (5.88 \pm 0.35) \times 10^1 + (4.91 \pm 0.22) \times 10^3 [\text{buffer}]$         |                                      |
| HA = CH <sub>3</sub> CO <sub>2</sub> H; [HA]/[A <sup>-</sup> ] = 1.00; [H <sup>+</sup> ] = 2.72×10 <sup>-5</sup> M |                                      |
| 8.00                                                                                                               | 34.6, 34.3, 32.3                     |
| 16.0                                                                                                               | 37.2, 39.6, 35.2, 35.3               |
| 24.0                                                                                                               | 51.5, 55.5, 55.0                     |
| 32.0                                                                                                               | 55.5, 57.2, 57.0                     |
| 40.0                                                                                                               | 61.3, 65.7, 64.2                     |
| $k_{\text{obs}}/\text{s}^{-1} = (2.44 \pm 0.20) \times 10^2 + (1.01 \pm 0.08) \times 10^4 [\text{buffer}]$         |                                      |

**Table S3.** (cont'd)

| [Buffer]/10 <sup>-3</sup> M                                                                                                                 | <i>k</i> <sub>obs</sub> /10 <sup>1</sup> s <sup>-1</sup> |
|---------------------------------------------------------------------------------------------------------------------------------------------|----------------------------------------------------------|
| HA = CH <sub>3</sub> CO <sub>2</sub> H; [HA]/[A <sup>-</sup> ] = 0.200; [H <sup>+</sup> ] = 5.44×10 <sup>-6</sup> M                         |                                                          |
| 4.80                                                                                                                                        | 102, 108, 103, 105                                       |
| 9.60                                                                                                                                        | 115, 115, 125                                            |
| 14.4                                                                                                                                        | 134, 141, 132, 130                                       |
| 19.2                                                                                                                                        | 145, 142, 142, 143                                       |
| 24.0                                                                                                                                        | 158, 156, 149, 154                                       |
| <i>k</i> <sub>obs</sub> /s <sup>-1</sup> = (9.36±0.21)×10 <sup>2</sup> + (2.59±0.13)×10 <sup>4</sup> [buffer]                               |                                                          |
| HA = H <sub>2</sub> PO <sub>4</sub> <sup>-</sup> ; [HA <sup>-</sup> ]/[A <sup>-</sup> ] = 7.00; [H <sup>+</sup> ] = 1.16×10 <sup>-6</sup> M |                                                          |
| 4.00                                                                                                                                        | 571, 566                                                 |
| 8.00                                                                                                                                        | 713, 698                                                 |
| 12.0                                                                                                                                        | 822, 826                                                 |
| 16.0                                                                                                                                        | 1030, 1000                                               |
| 20.0                                                                                                                                        | 1130, 1130                                               |
| <i>k</i> <sub>obs</sub> /s <sup>-1</sup> = (4.19±0.14)×10 <sup>3</sup> + (3.58±0.11)×10 <sup>5</sup> [buffer]                               |                                                          |
| HA = H <sub>2</sub> PO <sub>4</sub> <sup>-</sup> ; [HA <sup>-</sup> ]/[A <sup>-</sup> ] = 7.00; [H <sup>+</sup> ] = 1.16×10 <sup>-6</sup> M |                                                          |
| 8.00                                                                                                                                        | 757, 787, 774, 768, 771                                  |
| 12.0                                                                                                                                        | 930, 928, 9.09, 9.30, 9.18                               |
| 16.0                                                                                                                                        | 1050, 1050, 1090, 1060, 1090                             |
| 20.0                                                                                                                                        | 1170, 1220, 1170, 1190, 1170                             |
| 24.0                                                                                                                                        | 1320, 1360, 1330, 1330, 1340                             |

# Supplementary Material (ESI) for Chemical Communications  
# This journal is © The Royal Society of Chemistry 2005

$$k_{\text{obs}}/\text{s}^{-1} = (5.00 \pm 0.11) \times 10^3 + (3.48 \pm 0.06) \times 10^5 [\text{buffer}]$$

**Table S3.** (cont'd)

| [Buffer]/10 <sup>-3</sup> M                                                                                                                   | $k_{\text{obs}}/10^1 \text{ s}^{-1}$ |
|-----------------------------------------------------------------------------------------------------------------------------------------------|--------------------------------------|
| HA = H <sub>2</sub> PO <sub>4</sub> <sup>-</sup> ; [HA <sup>-</sup> ]/[A <sup>-</sup> ] = 4.00; [H <sup>+</sup> ] = 6.64 × 10 <sup>-7</sup> M |                                      |
| 7.50                                                                                                                                          | 1200, 1230, 1210, 1230, 1200         |
| 11.3                                                                                                                                          | 1470, 1390, 1430, 1450, 1440         |
| 15.0                                                                                                                                          | 1650, 1620, 1660, 1650, 1650         |
| 18.8                                                                                                                                          | 1830, 1830, 1860, 1790, 1830         |
| 22.5                                                                                                                                          | 2080, 2070, 2040, 2010, 2000         |

$$k_{\text{obs}}/\text{s}^{-1} = (8.15 \pm 0.15) \times 10^3 + (5.45 \pm 0.10) \times 10^5 [\text{buffer}]$$

HA = H<sub>2</sub>PO<sub>4</sub><sup>-</sup>; [HA<sup>-</sup>]/[A<sup>-</sup>] = 1.00; [H<sup>+</sup>] = 1.66 × 10<sup>-7</sup> M

|      |                              |
|------|------------------------------|
| 5.00 | 3420, 3320, 3280, 3360       |
| 7.50 | 3980, 3930, 3950, 3840, 4030 |
| 10.0 | 4280, 4270, 4230, 4370       |
| 12.5 | 4700, 4740, 4720, 4880, 4790 |
| 15.0 | 5020, 5130, 4900, 5030, 5060 |

$$k_{\text{obs}}/\text{s}^{-1} = (2.62 \pm 0.07) \times 10^4 + (1.66 \pm 0.06) \times 10^6 [\text{buffer}]$$

**Table S3.** (cont'd)

| [Buffer]/10 <sup>-3</sup> M                                                                                                                        | $k_{\text{obs}}/10^1 \text{ s}^{-1}$   |
|----------------------------------------------------------------------------------------------------------------------------------------------------|----------------------------------------|
| HA = H <sub>2</sub> PO <sub>4</sub> <sup>-</sup> ; [HA <sup>-</sup> ]/[A <sup>-</sup> ] = 0.333; [H <sup>+</sup> ] = 5.53×10 <sup>-8</sup> M       |                                        |
| 4.00                                                                                                                                               | 6720, 6630, 6600, 6650, 6690           |
| 6.00                                                                                                                                               | 7830, 7720, 7490, 7590, 7670           |
| 8.00                                                                                                                                               | 8130, 8240, 8320, 8340, 8440           |
| 10.0                                                                                                                                               | 8650, 8720, 8810, 8810, 8850           |
| 12.0                                                                                                                                               | 9200, 9600, 9640, 9610, 9510           |
| $k_{\text{obs}}/\text{s}^{-1} = (5.45 \pm 0) \times 10^4 + (3.41 \pm 0.12) \times 10^6 [\text{buffer}]$                                            |                                        |
| HA = (CH <sub>2</sub> OH) <sub>3</sub> CNH <sub>3</sub> <sup>+</sup> ; [BH <sup>+</sup> ]/[B] = 1.00; [H <sup>+</sup> ] = 8.20×10 <sup>-9</sup> M  |                                        |
| 20.0                                                                                                                                               | 30,000, 30,000, 29,200, 25,500, 27,400 |
| 30.0                                                                                                                                               | 35,200, 35,300, 36,400, 32,500, 32,500 |
| 40.0                                                                                                                                               | 40,600, 40,900, 34,000, 34,300, 34,100 |
| 50.0                                                                                                                                               | 44,200, 45,600, 45,000, 38,300, 40,000 |
| 60.0                                                                                                                                               | 50,500, 50,700, 41,800, 41,500, 41,200 |
| $k_{\text{obs}}/\text{s}^{-1} = (2.03 \pm 0.05) \times 10^5 + (5.01 \pm 0.12) \times 10^6 [\text{buffer}]$                                         |                                        |
| HA = (CH <sub>2</sub> OH) <sub>3</sub> CNH <sub>3</sub> <sup>+</sup> ; [BH <sup>+</sup> ]/[B] = 0.200; [H <sup>+</sup> ] = 1.64×10 <sup>-9</sup> M |                                        |
| 12.0                                                                                                                                               | 26,900, 27,800, 28,400, 26,100, 26,800 |
| 18.0                                                                                                                                               | 28,700, 29,500, 26,200, 27,200, 26,800 |
| 24.0                                                                                                                                               | 29,900, 30,600, 30,400, 28,000, 29,000 |
| 30.0                                                                                                                                               | 32,200, 32,500, 29,000, 29,600, 29,700 |
| 36.0                                                                                                                                               | 32,900, 33,700, 33,400, 31,900, 33,000 |
| $k_{\text{obs}}/\text{s}^{-1} = (2.48 \pm 0.04) \times 10^5 + (2.40 \pm 0.15) \times 10^6 [\text{buffer}]$                                         |                                        |

**Table S3.** (cont'd)

| [Buffer]/10 <sup>-3</sup> M                                                                                                                 | $k_{\text{obs}}/10^1 \text{ s}^{-1}$ |
|---------------------------------------------------------------------------------------------------------------------------------------------|--------------------------------------|
| <b>D<sub>2</sub>O:</b>                                                                                                                      |                                      |
| DA = D <sub>2</sub> PO <sub>4</sub> <sup>-</sup> ; [DA <sup>-</sup> ]/[A <sup>-</sup> ] = 7.00; [D <sup>+</sup> ] = 3.44×10 <sup>-7</sup> M |                                      |
| 4.71                                                                                                                                        | 7.43, 7.77, 7.09                     |
| 9.45                                                                                                                                        | 112, 122, 112, 113                   |
| 14.4                                                                                                                                        | 149, 150, 147, 152                   |
| 19.3                                                                                                                                        | 185, 191, 185, 185                   |
| 24.1                                                                                                                                        | 232, 243, 233, 228                   |
| $k_{\text{obs}}/\text{s}^{-1} = (3.60 \pm 0.29) \times 10^2 + (8.04 \pm 0.18) \times 10^4 [\text{buffer}]$                                  |                                      |
| DA = D <sub>2</sub> PO <sub>4</sub> <sup>-</sup> ; [DA <sup>-</sup> ]/[A <sup>-</sup> ] = 4.00; [D <sup>+</sup> ] = 1.90×10 <sup>-7</sup> M |                                      |
| 4.50                                                                                                                                        | 128, 128, 120                        |
| 8.98                                                                                                                                        | 199, 193, 185, 187                   |
| 13.5                                                                                                                                        | 239, 242, 244, 233                   |
| 18.2                                                                                                                                        | 304, 312, 304, 304                   |
| 22.7                                                                                                                                        | 351, 342, 348, 342                   |
| $k_{\text{obs}}/\text{s}^{-1} = (7.74 \pm 0.43) \times 10^2 + (1.21 \pm 0.03) \times 10^5 [\text{buffer}]$                                  |                                      |
| DA = D <sub>2</sub> PO <sub>4</sub> <sup>-</sup> ; [DA <sup>-</sup> ]/[A <sup>-</sup> ] = 1.00; [D <sup>+</sup> ] = 4.84×10 <sup>-8</sup> M |                                      |
| 3.92                                                                                                                                        | 445, 441, 432, 432                   |
| 8.04                                                                                                                                        | 563, 583, 569, 567, 559, 595         |
| 12.1                                                                                                                                        | 7658, 732, 742, 733, 760             |
| 16.2                                                                                                                                        | 886, 918, 922, 927, 911              |



# Supplementary Material (ESI) for Chemical Communications  
# This journal is © The Royal Society of Chemistry 2005

20.2

1020, 1010, 1020, 1030, 1030

$$k_{\text{obs}}/\text{s}^{-1} = (2.89 \pm 0.10) \times 10^3 + (3.72 \pm 0.07) \times 10^5 [\text{buffer}]$$

**Table S3.** (cont'd)

| [Buffer]/10 <sup>-3</sup> M | $k_{\text{obs}}/10^1 \text{ s}^{-1}$ |
|-----------------------------|--------------------------------------|
| 3.22                        | 744, 760, 760, 761, 756              |
| 6.36                        | 920, 912, 911, 921, 935, 926         |
| 9.52                        | 1080, 1070, 1020, 1130, 1060, 110    |
| 12.9                        | 1290, 1280, 1290, 1280, 1310, 1270   |
| 16.1                        | 1410, 1420, 1400, 1410, 1430, 1400   |

$k_{\text{obs}}/\text{s}^{-1} = (5.89 \pm 0.11) \times 10^3 + (5.20 \pm 0.10) \times 10^5 [\text{buffer}]$

<sup>a</sup>Ionic strength = 0.10 M (NaClO<sub>4</sub>)
